# Supplementary material for: Suitability of Ex Vivo-Expanded Microtic Perichondrocytes for Auricular Reconstruction
Source: MDPI journal article supplement (doi:10.3390/cells13020141), 2024-01-12
Supplement: s1 [file s1]

**Table S1.** Primers for qPCR.

| Gene           | s or as | Sequence               | UPL Probe |
|----------------|---------|------------------------|-----------|
| B2M            | s       | TTCTGGCCTGGAGGCTAT     | 12        |
| B2M            | as      | TCAGGAAATTGACTTTCCATTC | 12        |
| $\beta$ -Actin | s       | ATTGGCAATGAGCGGTTC     | 11        |
| $\beta$ -Actin | as      | CGTGGATGCCACAGGACT     | 11        |
| SOX9           | s       | TCTCGCTCTCGTTCAGAAAGTC | 61        |
| SOX9           | as      | GTACCCGCACTTGACACAAC   | 61        |
| ACAN           | s       | CCTCCCCTTCACGTGTAAAA   | 76        |
| ACAN           | as      | GCTCCGCTTCTGTAGTCTGC   | 76        |
| Elastin        | s       | GGAGGTGTTCCCGGAGTC     | 27        |
| Elastin        | as      | GGTCCCCACTCCGTACTTG    | 27        |
| COL2A1         | s       | GTGAACCTGGTGTCTCTGGTC  | 19        |
| COL2A1         | as      | TTTCCAGGTTTTCCAGCTTC   | 19        |
| COL1A1         | s       | GGGATTCCCTGGACCTAAAG   | 67        |
| COL1A1         | as      | GGAACACCTCGCTCTCCA     | 67        |

**Table S2.** Antibodies for immunohistochemistry.

| Antibody                          | Species | Dilution | Enzyme digestion                                  | Isotype                  | Manufacturer                  |
|-----------------------------------|---------|----------|---------------------------------------------------|--------------------------|-------------------------------|
| Aggrecan, polyclonal              | Rabbit  | 1:100    | Pepsin 2 $\mu$ g/mL in TRIS-HCl (1 mg/mL), pH 2.0 | Rabbit IgG, polyclonal   | Merck KGaA, Germany-Darmstadt |
| Collagen I, polyclonal, #34710    | Rabbit  | 1:200    | Proteinase K                                      | Rabbit IgG, polyclonal   | Abcam, Berlin, Germany        |
| Collagen II, II-II6B3, Monoclonal | Mouse   | 1:100    | Citrat + Proteinase K                             | MIgG1, kappa light chain | DSHB 3822                     |
| Elastin, polyclonal, #23747       | Rabbit  | 1:400    | TRIS-EDTA/Citrat                                  | Rabbit IgG, polyclonal   | Abcam, Berlin Germany         |

**Table S3.** Antibodies for Flow Cytometry.

| Antibody for Flow Cytometry    | clone     | Isotype      | Manufacturer                                              |
|--------------------------------|-----------|--------------|-----------------------------------------------------------|
| APC anti-human CD29            | TS2/16    | Mouse IgG1,  | BioLegend, US-San Diego                                   |
| PerCP anti-mouse/human CD44    | IM7       | Rat IgG2b,   | BioLegend, US-San Diego                                   |
| PE anti-human CD49e            | NKI-SAM-1 | Mouse IgG2b, | BioLegend, US-San Diego                                   |
| eFlour™ 450 anti-human CD73    | AD2       | IgG1,        | eBioscience, ThermoFischer Scientific, Germany - Schwerte |
| FITC anti-human CD90           | 5E10      | Mouse IgG1,  | BioLegend, US-San Diego                                   |
| FITC anti-human CD105          | 43A3      | Mouse IgG1,  | BioLegend, US-San Diego                                   |
| PE anti-human CD146            | P1H12;    | Mouse IgG1,  | BioLegend, US-San Diego                                   |
| APC/Fire™ 750 anti-human CD166 | 3A6       | Mouse IgG1,  | BioLegend, US-San Diego                                   |
